# Supplementary material
Source: publisher figshare collection journal article supplement (https://acs.figshare.com/ndownloader/files/3883099)
Supplement: Supplementary file 1 [file 3883099]

## Supporting Information

# Amphiphilic Polymer-Mediated Formation of Laponite<sup>®</sup>-Based Nanohybrids with Robust Stability and pH Sensitivity for Anticancer Drug Delivery

*Guoying Wang,<sup>†</sup> Dina Maciel,<sup>†</sup> Yilun Wu,<sup>§</sup> João Rodrigues,<sup>†</sup> Xiangyang Shi,<sup>†,‡</sup> Yuan Yuan,<sup>§</sup> Changsheng Liu,<sup>§</sup> Helena Tomás, \*<sup>†</sup> Yulin Li\*<sup>†,§</sup>*

<sup>†</sup> CQM – Centro de Química da Madeira, MMRG, Universidade da Madeira, Campus Universitário da Penteada, 9020-105 Funchal, Portugal. Tel.: +351-291705116; Fax: +351-291705249.

<sup>§</sup>The State Key Laboratory of Bioreactor Engineering and Key Laboratory for Ultrafine Materials of Ministry of Education, East China University of Science and Technology, Shanghai 200237, People's Republic of China.

<sup>‡</sup> College of Chemistry, Chemical Engineering and Biotechnology, Donghua University, Shanghai 201620, People's Republic of China.

E-mail address: [yulinli@uma.pt](mailto:yulinli@uma.pt), [yulinli@ecust.edu.cn](mailto:yulinli@ecust.edu.cn) (Yulin Li); [lenat@uma.pt](mailto:lenat@uma.pt) (Helena Tomás).

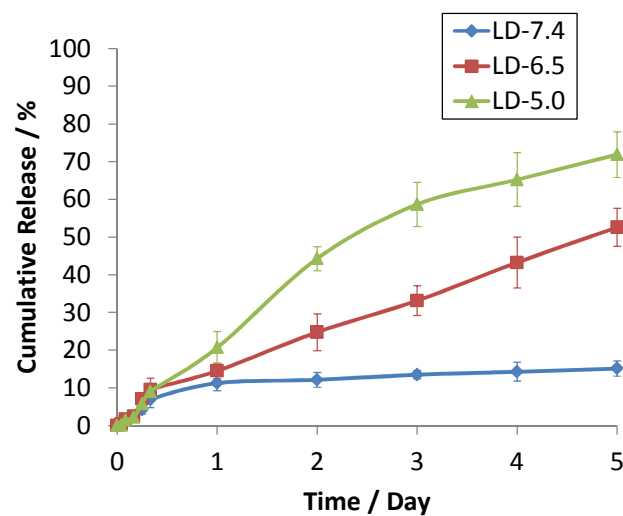

**Figure S1.** The cumulative release profiles for LD nanocomplexes at different pH values (7.4, 6.5, 5.0) in PBS solution as a function of soaking time. The LD nanohybrids assumed an acidic-accelerated DOX release ability.

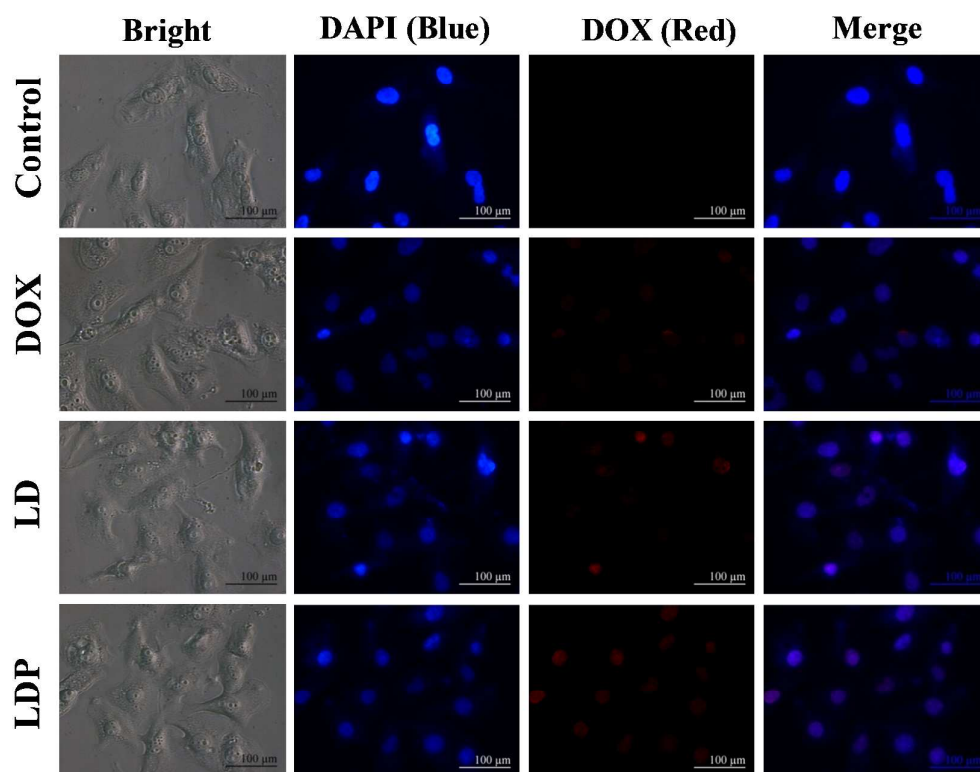

**Figure S2.** Bright field and fluorescence microscope images of CAL-72 cells after 2 h culture with H<sub>2</sub>O (control), free DOX, LD and LDP nanohybrids with an equivalent amount of DOX (1.5  $\mu$ M) dissolved in the culture medium. The cells treated with the LDP nanohybrids presented a higher reddish intensity inside both cytosol and nucleus (especially in nucleus) than both free DOX and LD nanohybrids, indicating their enhanced cell uptake ability.

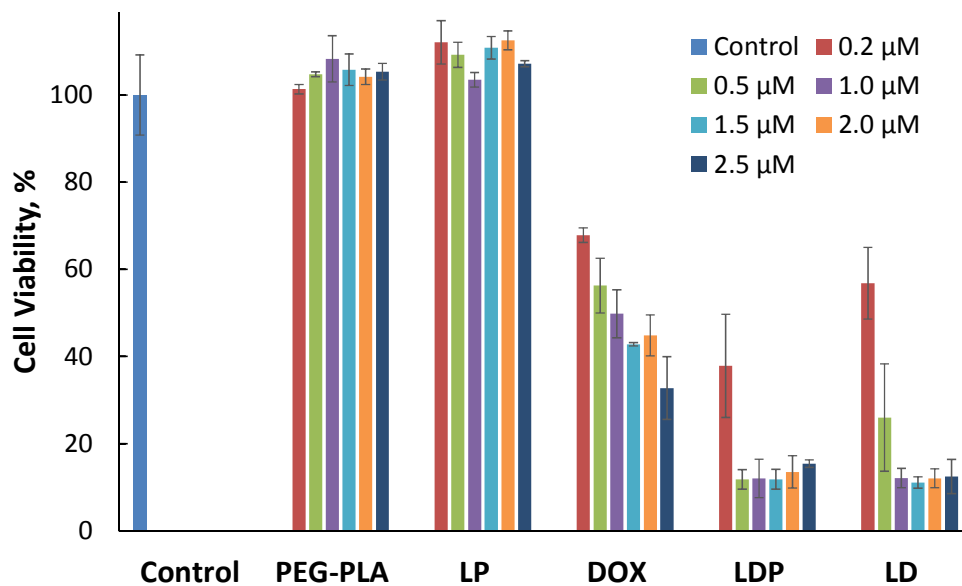

**Figure S3.** Cell viability/cytotoxicity of free DOX, LD, and LDP nanohybrids (with equivalent DOX concentration) and LP, PEG-PLA (with equivalent weight concentration of the corresponding LDP nanohybrids) after 48 h of cell culture with the NIH 3T3 cells ( $\pm$  standard deviation,  $n = 3$ ).
